# Supplementary material for: Anomalous Amide Proton Chemical Shifts as Signatures of Hydrogen Bonding to Aromatic Sidechains
Source: Copernicus journal article supplement (doi:10.5194/mr-2021-53), 2021-07-01
Supplement: Supplementary file 1 [file mr-2021-53-supplement.pdf]

| Reason for Exclusion                                                   | # Excluded | Examples (BMRB ID, PDB ID)                                                                                                                                                                                                   |
|------------------------------------------------------------------------|------------|------------------------------------------------------------------------------------------------------------------------------------------------------------------------------------------------------------------------------|
| DNA/RNA entries, entries with ligands, oligomers and protein complexes | 1756       | (50269, 7JXG)                                                                                                                                                                                                                |
| Severe residue index mismatch between PDB and BMRB                     | 1194       | (50268, 6XB7)                                                                                                                                                                                                                |
| No restraint file                                                      | 710        | (50015, 6YJ0)                                                                                                                                                                                                                |
| No distance restraints in restraints file                              | 190        | (50263, 6Z0G)                                                                                                                                                                                                                |
| No aromatic residues in sequence                                       | 152        | (50202, 6YFY)                                                                                                                                                                                                                |
| >3500 distance restraints *                                            | 151        | (36176, 5ZMR)                                                                                                                                                                                                                |
| Restrained amide-aromatic pairs > 8Å apart *                           | 141        | (36000, 5B7A)                                                                                                                                                                                                                |
| Residue index mismatch between restraint and structure files           | 81         | (36097, 5XR1)                                                                                                                                                                                                                |
| Structure not yet released in PDB                                      | 21         | (50842, 7MC3)                                                                                                                                                                                                                |
| BMRB entry only exists in NMR-STAR 2.0                                 | 6          | (19704, 2MJ4)                                                                                                                                                                                                                |
| Empty restraint file                                                   | 4          | (25068, 2MRC)                                                                                                                                                                                                                |
| Misformatted restraint file                                            | 3          | (4540, 1QTG)                                                                                                                                                                                                                 |
| Miscellaneous                                                          | 15         | (34476, OTWG), (25510, 2N00), (25508, 2MZY), (25499, 2MZT), (25497, 2MZR), (25493, 5ODD), (25489, 2MZI), (25496, 2MZQ), (17985, 2LK9), (6187, 1SF0), (25984, 2NBN), (5864, 1P9F), (6059, 1RFH), (16665, 2KSI), (19214, 2M7V) |

**Supp. Table 1:** Reasons for the exclusion of BMRB/PDB entries from the analysis. Most reasons make analysis difficult (e.g. index mismatches) or impossible (e.g. no restraint file). Reasons with a \* were implemented to maintain quality. An entry having > 3500 distance restraints or restraints between amide-aromatic pairs that were > 8 Å apart was in some cases indicative of deeper problems with the restraint assignments, such as restraints being assigned between all atoms.
